# Supplementary material
Source: publisher figshare collection journal article supplement (https://sage.figshare.com/ndownloader/files/13237289)
Supplement: Supplementary file 1 [file 13237289]

Supplementary materials (online only)

**Table A-1. State adoption of teacher evaluation, by district implementation status**

|                                                  | Number | Percent |
|--------------------------------------------------|--------|---------|
| <i>States with large district implementer</i>    |        |         |
| Adopted after district implementation            | 5      | 9.8     |
| Adopted in same year as district implementation  | 3      | 5.9     |
| Adopted before district implementation           | 22     | 43.1    |
| No state adoption                                | 7      | 13.7    |
| <i>States without large district implementer</i> |        |         |
| Adopted                                          | 2      | 3.9     |
| Did not adopt                                    | 12     | 23.5    |

**Table A-2. State independent, dependent, and descriptive variable codes**

| State | Adoption year <sup>1</sup> | Implementation year <sup>2</sup> | Gates grant <sup>3</sup> | RTTT Phase 1 win | RTTT Phase 2 win | Districts in dataset | Year of 1st district implementation <sup>4</sup> |
|-------|----------------------------|----------------------------------|--------------------------|------------------|------------------|----------------------|--------------------------------------------------|
| AK    | 2013                       |                                  |                          | 0                | 0                | 2                    |                                                  |
| AL    |                            |                                  |                          | 0                | 0                | 2                    |                                                  |
| AR    | 2010                       | 2014                             | 2009                     | 0                | 0                | 2                    | 2014                                             |
| AZ    | 2010                       | 2013                             |                          | 0                | 0                | 2                    | 2012                                             |
| CA    |                            |                                  |                          | 0                | 0                | 7                    | 2013                                             |
| CO    | 2010                       | 2013                             | 2010                     | 0                | 0                | 4                    | 2010                                             |
| CT    | 2012                       | 2016                             |                          | 0                | 0                | 3                    | 2010                                             |
| DC    | 2009                       | 2009                             |                          | 0                | 1                | 1                    | 2009                                             |
| DE    | 2010                       | 2012                             |                          | 1                | 0                | 2                    | 2012                                             |
| FL    | 2010                       | 2011                             | 2009                     | 0                | 1                | 10                   | 2010                                             |
| GA    | 2012                       | 2014                             | 2009                     | 0                | 1                | 5                    | 2011                                             |
| HI    | 2012                       | 2016                             |                          | 0                | 1                | 1                    | 2013                                             |
| IA    |                            |                                  |                          | 0                | 0                | 2                    |                                                  |
| ID    | 2013                       | 2014                             |                          | 0                | 0                | 2                    | 2014                                             |
| IL    | 2010                       | 2016                             |                          | 0                | 0                | 2                    | 2012                                             |
| IN    | 2010                       | 2014                             |                          | 0                | 0                | 2                    | 2012                                             |
| KS    |                            |                                  |                          | 0                | 0                | 2                    |                                                  |
| KY    | 2012                       | 2014                             | 2011                     | 0                | 0                | 2                    | 2014                                             |
| LA    | 2009                       | 2012                             | 2009                     | 0                | 0                | 4                    | 2012                                             |
| MA    | 2011                       | 2013                             |                          | 0                | 1                | 2                    | 2012                                             |
| MD    |                            |                                  |                          | 0                | 1                | 5                    | 2013                                             |
| ME    |                            |                                  |                          | 0                | 0                | 2                    | 2013                                             |
| MI    | 2010                       | 2015                             |                          | 0                | 0                | 2                    | 2012                                             |
| MN    |                            |                                  |                          | 0                | 0                | 3                    | 2012                                             |
| MO    |                            |                                  |                          | 0                | 0                | 3                    | 2015                                             |
| MS    | 2010                       | 2014                             |                          | 0                | 0                | 2                    | 2014                                             |
| MT    |                            |                                  |                          | 0                | 0                | 2                    |                                                  |
| NC    | 2011                       | 2012                             |                          | 0                | 1                | 3                    | 2010                                             |
| ND    | 2013                       | 2015                             |                          | 0                | 0                | 2                    |                                                  |
| NE    |                            |                                  |                          | 0                | 0                | 2                    |                                                  |
| NH    |                            |                                  |                          | 0                | 0                | 2                    | 2014                                             |
| NJ    | 2011                       | 2013                             |                          | 0                | 0                | 2                    | 2013                                             |
| NM    | 2012                       | 2013                             |                          | 0                | 0                | 2                    | 2013                                             |
| NV    | 2011                       |                                  |                          | 0                | 0                | 2                    |                                                  |
| NY    | 2010                       | 2011                             | 2012                     | 0                | 1                | 3                    | 2013                                             |
| OH    | 2011                       | 2013                             | 2009                     | 0                | 1                | 5                    | 2013                                             |
| OK    | 2011                       | 2015                             |                          | 0                | 0                | 2                    | 2014                                             |
| OR    |                            |                                  |                          | 0                | 0                | 2                    | 2015                                             |
| PA    | 2012                       | 2013                             | 2010                     | 0                | 0                | 2                    | 2011                                             |
| RI    | 2010                       | 2013                             |                          | 0                | 1                | 2                    | 2012                                             |
| SC    |                            |                                  |                          | 0                | 0                | 2                    |                                                  |
| SD    |                            |                                  |                          | 0                | 0                | 2                    |                                                  |
| TN    | 2009                       | 2012                             | 2014                     | 1                | 0                | 2                    | 2010                                             |

|    |      |      |   |   |   |      |
|----|------|------|---|---|---|------|
| TX | 2016 |      | 0 | 0 | 9 | 2011 |
| UT | 2011 | 2015 | 0 | 0 | 3 | 2015 |
| VA | 2011 | 2012 | 0 | 0 | 5 | 2012 |
| VT |      |      | 0 | 0 | 2 |      |
| WA |      | 2012 | 0 | 0 | 2 |      |
| WI |      |      | 0 | 0 | 2 |      |
| WV | 2011 | 2013 | 0 | 0 | 2 | 2013 |
| WY |      |      | 0 | 0 | 2 |      |

<sup>1</sup> Years in cells denote year of first adoption for states that implemented. Blank cells denote states that did not adopt.

<sup>2</sup> Years in cells denote year of the first district in the state to implement (from our dataset of 142 districts). Blank cells denote states that did not have a large district adopt.

<sup>3</sup> Years in cells are year of first Gates grant if state received more than one. Blank cells denote states that did not receive a Gates grant.

<sup>4</sup> Years in cells are year of first district implementation. Blank cells denote states that do not have a district in our dataset that has implemented.

**Table A-3. District implementation years for all study school districts**

| State | District                                  | District implementation year |
|-------|-------------------------------------------|------------------------------|
| AK    | Matanuska-Susitna Borough School District |                              |
| AK    | Anchorage School District                 |                              |
| AL    | Birmingham City Schools                   |                              |
| AL    | Mobile County Public Schools              |                              |
| AR    | Little Rock Public Schools                | 2014                         |
| AR    | Springdale School District                | 2014                         |
| AZ    | Tucson Unified District                   | 2015                         |
| AZ    | Mesa Public Schools                       | 2012                         |
| CA    | Los Angeles Unified School District       | 2013                         |
| CA    | Fresno Unified School District            | 2013                         |
| CA    | Sacramento City Unified School District   |                              |
| CA    | San Francisco Unified School District     |                              |
| CA    | Oakland Unified School District           |                              |
| CA    | Long Beach Unified School District        |                              |
| CA    | San Diego Unified School District         |                              |
| CO    | Douglas County School District            | 2012                         |
| CO    | Harrison School District Two              | 2010                         |
| CO    | Jefferson County Public Schools           | 2013                         |
| CO    | Denver Public Schools                     | 2015                         |
| CT    | Bridgeport Public Schools                 | 2014                         |
| CT    | Hartford Public Schools                   | 2013                         |
| CT    | New Haven School District                 | 2010                         |
| DC    | District of Columbia Public Schools       | 2009                         |
| DE    | Red Clay Consolidated School District     | 2012                         |
| DE    | Christina School District                 | 2012                         |
| FL    | Brevard County School District            | 2011                         |
| FL    | Pinellas County School District           | 2011                         |
| FL    | Palm Beach County School District         | 2011                         |
| FL    | Miami-Dade County School District         | 2011                         |
| FL    | Lee County School District                | 2011                         |
| FL    | Polk County School District               | 2011                         |
| FL    | Duval County School District              | 2011                         |
| FL    | Hillsborough County School District       | 2010                         |
| FL    | Broward County School District            | 2011                         |
| FL    | Orange County School District             | 2011                         |
| GA    | DeKalb County School System               | 2013                         |
| GA    | Cobb County School District               | 2014                         |
| GA    | Gwinnett County Public Schools            | 2013                         |
| GA    | Fulton County Schools                     | 2013                         |
| GA    | Atlanta Public Schools                    | 2011                         |
| HI    | Hawaii Department of Education            | 2013                         |
| IA    | Cedar Rapids Comm School District         |                              |
| IA    | Des Moines Public Schools                 |                              |
| ID    | Boise Independent District                | 2014                         |

| State | District                                   | District implementation year |
|-------|--------------------------------------------|------------------------------|
| ID    | West Ada School District                   | 2014                         |
| IL    | Elgin School District U-46                 |                              |
| IL    | Chicago Public Schools                     | 2012                         |
| IN    | Fort Wayne Community Schools               | 2012                         |
| IN    | Indianapolis Public Schools                | 2012                         |
| KS    | Wichita Public Schools                     |                              |
| KS    | Olathe Unified School District 233         |                              |
| KY    | Fayette County                             | 2014                         |
| KY    | Jefferson County Public Schools            | 2014                         |
| LA    | Jefferson Parish Public Schools            | 2012                         |
| LA    | East Baton Rouge Parish School System      | 2012                         |
| LA    | New Orleans Public Schools                 | 2012                         |
| LA    | Caddo Parish Public Schools                | 2012                         |
| MA    | Boston Public Schools                      | 2012                         |
| MA    | Springfield Public Schools                 | 2012                         |
| MD    | Baltimore County Public Schools            | 2013                         |
| MD    | Anne Arundel County Public Schools         |                              |
| MD    | Prince George's County Public Schools      | 2013                         |
| MD    | Montgomery County Public Schools           |                              |
| MD    | Baltimore City Public School System        | 2013                         |
| ME    | Portland Public Schools, ME                | 2013                         |
| ME    | Lewiston Public Schools                    |                              |
| MI    | Detroit Public Schools                     | 2012                         |
| MI    | Utica Community Schools                    | 2013                         |
| MN    | Minneapolis Public Schools                 | 2012                         |
| MN    | St. Paul Public Schools                    | 2014                         |
| MN    | Anoka-Hennepin Independent School District |                              |
| MO    | Springfield Public Schools                 |                              |
| MO    | St. Louis Public School District           | 2015                         |
| MO    | Kansas City, Missouri School District      | 2015                         |
| MS    | Desoto County School District              | 2014                         |
| MS    | Jackson Public Schools                     | 2014                         |
| MT    | Billings Public Schools                    |                              |
| MT    | Great Falls Public Schools                 |                              |
| NC    | Charlotte-Mecklenburg Schools              | 2012                         |
| NC    | Wake County Schools                        | 2010                         |
| NC    | Guilford County Schools                    | 2010                         |
| ND    | Fargo Public Schools                       |                              |
| ND    | Bismarck Public Schools                    |                              |
| NE    | Omaha Public Schools                       |                              |
| NE    | Lincoln Public Schools                     |                              |
| NH    | Nashua School District                     | 2014                         |
| NH    | Manchester School District                 | 2014                         |
| NJ    | Jersey City Public Schools                 | 2013                         |
| NJ    | Newark School District                     | 2014                         |

| <b>State</b> | <b>District</b>                               | <b>District implementation year</b> |
|--------------|-----------------------------------------------|-------------------------------------|
| NM           | Albuquerque Public Schools                    | 2013                                |
| NM           | Las Cruces Public Schools                     | 2013                                |
| NV           | Washoe County School District                 |                                     |
| NV           | Clark County School District                  |                                     |
| NY           | New York City Public Schools                  | 2013                                |
| NY           | Buffalo City School District                  | 2013                                |
| NY           | Rochester City School District                | 2013                                |
| OH           | Cleveland Metropolitan School District        | 2013                                |
| OH           | Columbus Public Schools                       | 2013                                |
| OH           | Toledo Public Schools                         | 2013                                |
| OH           | Cincinnati City School District               | 2013                                |
| OH           | Dayton City School District                   | 2013                                |
| OK           | Oklahoma City Public Schools                  |                                     |
| OK           | Tulsa Public Schools                          | 2014                                |
| OR           | Portland Public Schools, OR                   | 2015                                |
| OR           | Salem-Keizer SD 24J                           |                                     |
| PA           | Philadelphia School District                  | 2013                                |
| PA           | Pittsburgh Public Schools                     | 2011                                |
| RI           | Cranston                                      | 2012                                |
| RI           | Providence Public School District             | 2012                                |
| SC           | Greenville County Schools                     |                                     |
| SC           | Charleston County School District             |                                     |
| SD           | Rapid City Area School District 51-4          |                                     |
| SD           | Sioux Falls School District                   |                                     |
| TN           | Shelby County Schools/Memphis                 | 2010                                |
| TN           | Metropolitan Nashville Public Schools         | 2011                                |
| TX           | Austin Independent School District            |                                     |
| TX           | Dallas Independent School District            | 2014                                |
| TX           | Northside Independent School District         |                                     |
| TX           | Fort Bend Independent School District         |                                     |
| TX           | Fort Worth Independent School District        |                                     |
| TX           | Aldine Independent School District            | 2013                                |
| TX           | Brownsville Independent School District       |                                     |
| TX           | Houston Independent School District           | 2011                                |
| TX           | Cypress-Fairbanks Independent School District |                                     |
| UT           | Alpine School District                        | 2015                                |
| UT           | Davis School District                         | 2015                                |
| UT           | Granite School District                       | 2015                                |
| VA           | Virginia Beach City Public Schools            | 2012                                |
| VA           | Prince William County Public Schools          | 2012                                |
| VA           | Fairfax County Public Schools                 | 2012                                |
| VA           | Norfolk Public Schools                        | 2012                                |
| VA           | Richmond City Public Schools                  | 2012                                |
| VT           | South Burlington School District              |                                     |
| VT           | Burlington School District                    |                                     |

| <b>State</b> | <b>District</b>                      | <b>District implementation year</b> |
|--------------|--------------------------------------|-------------------------------------|
| WA           | Spokane School District              |                                     |
| WA           | Seattle Public Schools               |                                     |
| WI           | Milwaukee Public Schools             |                                     |
| WI           | Madison Metropolitan School District |                                     |
| WV           | Kanawha County Schools               | 2013                                |
| WV           | Berkeley County Schools              | 2013                                |
| WY           | Natrona County School District #1    |                                     |
| WY           | Laramie School District One          |                                     |

Years in cells are district implementation year. Blank cells denote districts that have not yet implemented a teacher evaluation system.
